# Supplementary material
Source: MDPI journal article supplement (https://www.mdpi.com/2071-1050/10/4/1131)
Supplement: s1 [file s1]

# Carbon Footprints of Urban Residential Buildings: A Household Survey-Based Approach

Xiaomei Yan <sup>1,2,3</sup>, Shenghui Cui <sup>1,3,\*</sup>, Lilai Xu <sup>1,3</sup>, Jianyi Lin <sup>1,3</sup> and Ghaffar Ali <sup>1,3</sup>

<sup>1</sup> Key Lab of Urban Environment and Health, Institute of Urban Environment, Chinese Academy of Sciences, 1799, Jimei Road, Xiamen 361021, China; xmyan@iue.ac.cn (X.Y.); llxu@iue.ac.cn (L.X.); jylin@iue.ac.cn (J.L.); ghafar.gs@gmail.com (G.A.)

<sup>2</sup> University of Chinese Academy of Sciences, Beijing 100049, China

<sup>3</sup> Xiamen Key Lab of Urban Metabolism, Institute of Urban Environment, Chinese Academy of Sciences, Xiamen 361021, China

\* Corresponding author: shcui@iue.ac.cn; Tel.: +86-0592-619-0777

Received: 28 February 2018; Accepted: 05 April 2018; Published: 10 April 2018

This document contains 7 pages, with 4 Figures and 7 Tables.

**Table S1.** Standards for transforming qualitative variables into ordinal variables.

| Qualitative variables                                                                | Transform Standards                                                                                  |
|--------------------------------------------------------------------------------------|------------------------------------------------------------------------------------------------------|
| Household income (yuan/year)                                                         | <50,000 = 1; 50,000~100,000 = 2; 100,000~200,000 = 3; 200,000~400,000 = 4; >400,000 = 5              |
| Education                                                                            | Elementary or below = 1; Junior = 2; Senior = 3; College = 4; Graduate = 5; Others = 6               |
| Building age                                                                         | Before 1981 = 1, between 1981~1990 = 2, between 1991~2000 = 3, between 2001~2010 = 4, after 2010 = 5 |
| Housing ownership                                                                    | rental = 1; mortgage = 2                                                                             |
| Housing type (Property Right)                                                        | Owner-occupied = 1, rented = 2, subsidized = 3, owner-built = 4, others = 5                          |
| Single parent                                                                        | no = 0; yes = 1                                                                                      |
| Religion                                                                             | no = 0; yes = 1                                                                                      |
| House structure                                                                      | Wood = 1; wood-brick = 2; masonry-concrete = 3; steel-concrete = 4                                   |
| Which religion                                                                       | Buddhist = 3; Christian = 4; Muslim = 5; Taoist = 6                                                  |
| Windows                                                                              | Transparent = 1; with color = 2                                                                      |
| Do you encourage your family and friends to conserve energy?                         | Never = 1; seldom = 2; often = 3; very often = 4; always = 5                                         |
| Do you support the government's Low-carbon initiative?                               | Never = 1; seldom = 2; often = 3; very often = 4; always = 5                                         |
| Do you pay attention to the use of energy-saving products?                           | Never = 1; seldom = 2; often = 3; very often = 4; always = 5                                         |
| If there is a preferential policy, do you value the practice of energy conservation? | Never = 1; seldom = 2; often = 3; very often = 4; always = 5                                         |
| Do you think that saving energy is saving money?                                     | Yes = 1; No = 2                                                                                      |
| Do you think that saving energy is required by environmental laws and regulations?   | Yes = 1; No = 2                                                                                      |

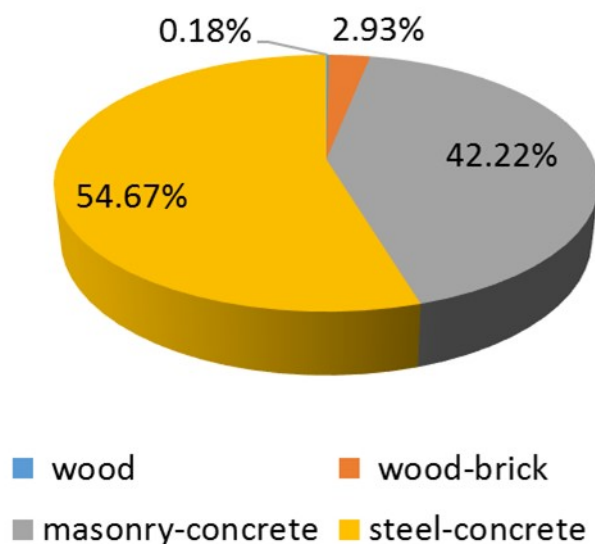

**Figure S1.** Urban residential building structure types in Xiamen city.

**Table S2.** Average carbon emission factors of Fujian Province grid from 2010 to 2014.

| Grid        | 2010   | 2011   | 2012   | 2013   | 2014   | Average |
|-------------|--------|--------|--------|--------|--------|---------|
| Fujian Grid | 0.6123 | 0.7440 | 0.6455 | 0.6699 | 0.6397 | 0.6623  |

**Table S3.** Oxidation rates of fuel types.

| Fuel Type | Carbon Content (tc/TJ) | Average Low Calorific Value (KJ/Kg(m <sup>3</sup> )) | Standard Coal Coefficient (Kgce/Kg(m <sup>3</sup> )) | Oxidation Rate (%) |
|-----------|------------------------|------------------------------------------------------|------------------------------------------------------|--------------------|
| Coal      | 26.37                  | 20,908                                               | 0.7143                                               | 81                 |
| LPG       | 17.20                  | 50,179                                               | 1.7143                                               | 99                 |
| Gas       | 15.32                  | 38,931                                               | 1.33                                                 | 99                 |
| Reference | [1]                    | [2]                                                  | [2]                                                  | [1]                |

**Table S4.** Comparison by per capita CO<sub>2</sub> emissions.

| Area                     | CO <sub>2</sub> Emissions (Metric Tons Per Capita) |
|--------------------------|----------------------------------------------------|
| World                    | 4.97                                               |
| East Asia & Pacific      | 6.29                                               |
| European Union           | 6.38                                               |
| Niger                    | 0.11                                               |
| India                    | 1.73                                               |
| United Kingdom           | 6.50                                               |
| Japan                    | 9.54                                               |
| United States            | 16.49                                              |
| United Arab Emirates     | 23.30                                              |
| China                    | 7.54                                               |
| Min value of this study  | 0.19                                               |
| Mean value of this study | 1.40                                               |
| Max value of this study  | 11.23                                              |

Source: The data of countries were taken from World Bank [3].

**Table S5.** Comparison of carbon footprints of building life cycle with other case studies.

| Reference    | Study Area                         | Min     | Max                              | Mean    | Lifespan |
|--------------|------------------------------------|---------|----------------------------------|---------|----------|
|              |                                    |         | tCO <sub>2</sub> /m <sup>2</sup> |         | Year     |
| [4]          | Review analyses of 95 case studies | 0.3485  | 6.485                            |         | 50       |
| [5]          | China                              |         |                                  | 1.425   | 50       |
| [6]          | United Kingdom                     |         |                                  | 4.25545 | 50       |
| [7]          | United States                      |         |                                  | 2.210   | 65       |
| [7]          | Switzerland                        |         |                                  | 1.7875  | 65       |
| [8]          | Malaysia                           |         |                                  | 3.720   | 50       |
| [9]          | Spain                              |         |                                  | 2.340   | 50       |
| [10]         | Canada                             | 1.765   | 25.785                           | 14.767  | 60       |
| [11]         | Italy                              | 2.650   | 3.65                             | 3.15    | 50       |
| [12]         | France                             | 0.415   | 1.91                             | 1.1625  | 50       |
| Our analysis | Xiamen, China                      | 0.76270 | 8.357                            | 2.39874 | 50       |

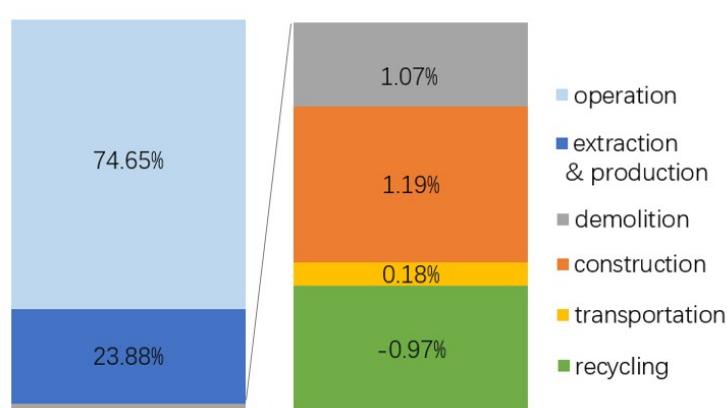**Figure S2.** Percentage carbon footprint distribution of six stages.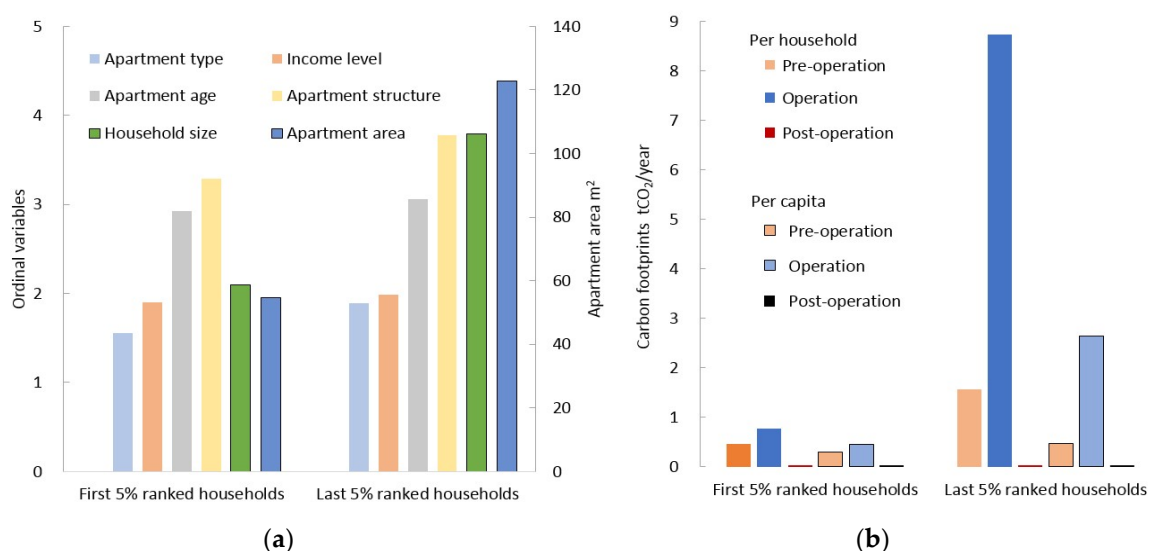**Figure S3.** (a) The socioeconomic attributes of households ranked first 5% and last 5%; (b) Per household and per capita carbon footprints of households ranked first 5% and last 5%.**Table S6.** Community ID.

| Community | ID | Community | ID |
|-----------|----|-----------|----|
| Xiayang   | 1  | Xiaoxue   | 24 |
| Ruijing   | 2  | Yingcui   | 25 |
| Ridong    | 3  | Huli      | 26 |

|              |    |               |    |
|--------------|----|---------------|----|
| Fengchaoshan | 4  | Houlu         | 27 |
| Xi'an        | 5  | Chengxi       | 28 |
| Songbai      | 6  | Ningbao       | 29 |
| Wenping      | 7  | Hexiangxi     | 30 |
| Lianyue      | 8  | Weilaihail'an | 31 |
| Qianpu       | 9  | Zengcuo'an    | 32 |
| Sili         | 10 | Dongdu        | 33 |
| Lianyuewucun | 11 | Jinshan       | 34 |
| Jinshang     | 12 | Changle       | 35 |
| Hetong       | 13 | Tangbian      | 36 |
| Biyue        | 14 | Lianxiu       | 37 |
| Haida        | 15 | Wenzao        | 38 |
| Shangli      | 16 | Xiangqiao     | 39 |
| Changqing    | 17 | Xin'ancun     | 40 |
| Yueyang      | 18 | Xiangping     | 41 |
| Binlang      | 19 | Wuxing        | 42 |
| Gulangyu     | 20 | Maluan        | 43 |
| Yuhou        | 21 | Fanghu        | 44 |
| Zhongshan    | 22 | Xindian       | 45 |
| Yinting      | 23 | Yecuo         | 46 |

Table S7. Operational CF of steel- and masonry-concrete structure.

|         | Per Household | Per Capita | Per unit Area (m <sup>2</sup> ) | Apartment Area (m <sup>2</sup> ) | Household Size |
|---------|---------------|------------|---------------------------------|----------------------------------|----------------|
| Steel   | 3.1474        | 1.0285     | 0.0326                          | 96.5                             | 3.26           |
| Masonry | 2.9634        | 1.0650     | 0.0336                          | 88.2                             | 3.05           |

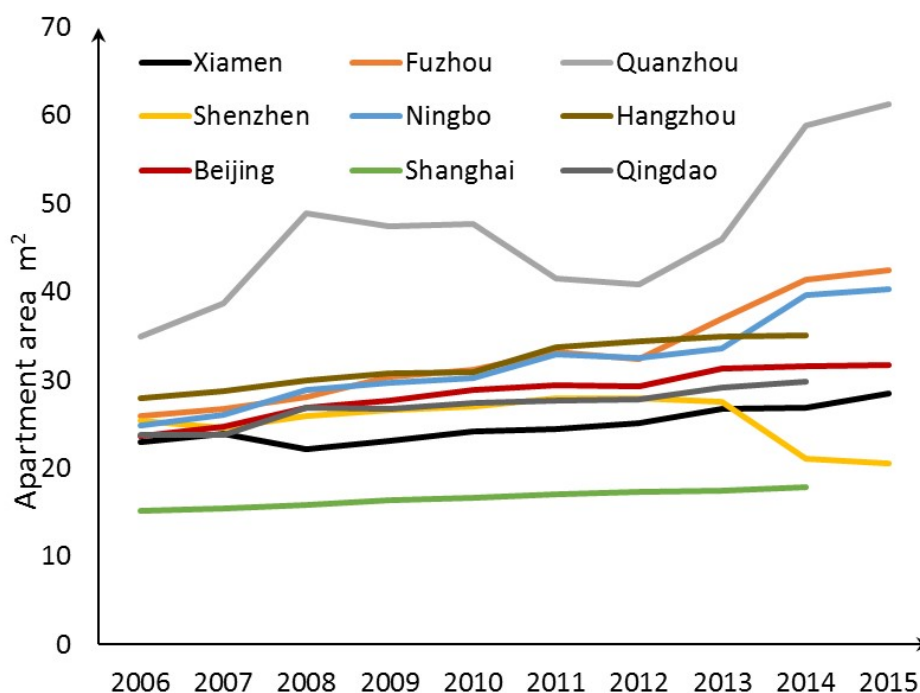

Figure S4. Per capita apartment areas of major cities in China.

## References

1. NDRC. *Provincial Greenhouse Gas Emission Inventory Guidelines*; National Development and Reform Commission: Beijing, China, 2010.
2. NBS. *China Energy Statistical Yearbook Energy Statistics Division*; National Bureau of Statistics: Beijing, China, 2006.

3. World Bank. Available online: <https://data.worldbank.org/indicator/EN.ATM.CO2E.PC?locations=XD> (accessed on 1 March 2018).
4. Chastas, P.; Theodosiou, T.; Kontoleon, K.J.; Bikas, D. Normalising and assessing carbon emissions in the building sector A review on the embodied CO<sub>2</sub> emissions of residential buildings. *Build. Environ.* **2018**, *130*, 212–226, doi:10.1016/j.buildenv.2017.12.032.
5. Hu, F.; Zheng, X. Carbon Emission of Energy Efficient Residential Building. *Procedia Eng.* **2015**, *121*, 1096–1102, doi:10.1016/j.proeng.2015.09.111.
6. Cuéllar-Franca, R.M.; Azapagic, A. Environmental impacts of the UK residential sector Life cycle assessment of houses. *Build. Environ.* **2012**, *54*, 86–99, doi:10.1016/j.buildenv.2012.02.005.
7. Mosteiro-Romero, M.; Krogmann, U.; Wallbaum, H.; Ostermeyer, Y.; Senick, J.S.; Andrews, C.J. Relative importance of electricity sources and construction practices in residential buildings A Swiss-US comparison of energy related life-cycle impacts. *Energy Build.* **2014**, *68*, 620–631, doi:10.1016/j.enbuild.2013.09.046.
8. Rashid, A.F.A.; Idris, J.; Yusoff, S. Environmental Impact Analysis on Residential Building in Malaysia Using Life Cycle Assessment. *Sustainability* **2017**, *9*, 1–15, doi:10.3390/su9030329.
9. Ortiz, O.; Bonnet, C.; Bruno, J.C.; Castells, F. Sustainability based on LCM of residential dwellings A case study in Catalonia, Spain. *Build. Environ.* **2009**, *44*, 584–594, doi:10.1016/j.buildenv.2008.05.004.
10. Zhang, W.; Tan, S.; Lei, Y.; Wang, S. Life cycle assessment of a single-family residential building in Canada A case study. *Build. Simul.* **2014**, *7*, 429–438, doi:10.1007/s12273-013-0159-y.
11. Asdrubali, F.; Baldassarri, C.; Fthenakis, V. Life cycle analysis in the construction sector: Guiding the optimization of conventional Italian buildings. *Energy Build.* **2013**, *64*, 73–89, doi:10.1016/j.enbuild.2013.04.018.
12. Hoxha, E.; Habert, G.; Lasvaux, S.; Chevalier, J.; Roy, R.L. Influence of construction material uncertainties on residential building LCA reliability. *J. Clean. Prod.* **2017**, *144*, 33–47, doi:10.1016/j.jclepro.2016.12.068.

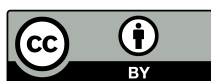

© 2018 by the authors. Submitted for possible open access publication under the terms and conditions of the Creative Commons Attribution (CC BY) license (<http://creativecommons.org/licenses/by/4.0/>).
